# Supplementary material
Source: publisher figshare collection journal article supplement (https://brill.figshare.com/articles/dataset/_/25568169)
Supplement: Supplementary file 1 [file 3]

| Families      | Species                                                   | GenBank   | Citations                |
|---------------|-----------------------------------------------------------|-----------|--------------------------|
| Saturniidae   | <i>Antheraea yamamai</i> (Guérin-Méneville, 1861)         | NC_012739 | Kim et al. (2009)        |
|               | <i>Antheraea frithi</i> Moore, 1859                       | KJ740437  | Shantibala et al. (2018) |
|               | <i>Antheraea pernyi</i> (Guérin-Méneville, 1855)          | NC_004622 | Liu et al. (2008)        |
|               | <i>Antheraea assamensis</i> (Helfer, 1837)                | KU379695  | Singh et al. (2017)      |
|               | <i>Antheraea formosana</i> Sonan, 1937                    | OK078922  | Cheng et al. (2022)      |
|               | <i>Antheraea polyphemus</i> (Cramer, 1776)                | NC_072344 | Liu (unpublished)        |
|               | <i>Actias luna</i> (Linnaeus, 1758)                       | MN832537  | Langley et al. (2020)    |
|               | <i>Actias selene</i> (Hübner, 1806)                       | JX186589  | Liu et al. (2012)        |
|               | <i>Actias aliena</i> (Butler, 1879)                       | KF927042  | Park et al. (2016)       |
|               | <i>Actias dubernardi</i> (Oberthür, 1897)                 | MW133617  | Zhao et al. (2021)       |
|               | <i>Rinaca boisduvalii</i> (Eversmann, 1846)               | MF034742  | Kim et al. (2017)        |
|               | <i>Rinaca jonasii</i> (Butler, 1877)                      | MF346379  | Kim et al. (2018)        |
|               | <i>Rinaca japonica</i> (Moore, 1862)                      | MT614593  | Liu et al. (2021)        |
|               | <i>Saturnia pyretorum</i> Westwood, 1847                  | FJ685653  | Jiang et al. (2009)      |
|               | <i>Samia wangi</i> Naumann & Peigler, 2001                | NC_068878 | Lu et al. (2022)         |
|               | <i>Samia cynthia</i> (Drury, 1773)                        | KC812618  | Sima et al. (2013)       |
|               | <i>Samia canningi</i> (Hutton, 1859)                      | NC_024270 | Shantibala et al. (2016) |
|               | <i>Samia ricini</i> (Jones, 1791)                         | NC_017869 | Kim et al. (2012)        |
|               | <i>Samia watsoni</i> (Oberthür, 1914)                     | NC_068851 | Lu et al. (2022)         |
|               | <i>Epiphora bauhiniiae</i> (Guérin-Méneville, 1832)       | OL912809  | Nethavhani et al. (2022) |
|               | <i>Attacus atlas</i> (Linnaeus, 1758)                     | NC_021770 | Chen et al. (2014)       |
|               | <i>Rhodinia fugax</i> (Butler, 1877)                      | MT548575  | Chen et al. (2021)       |
|               | <i>Solus drepanoides</i> (Moore, 1866)                    | OR773098  | This Paper               |
|               | <i>Solus parvifenestratus</i> Bryk, 1944                  | OR773097  | This Paper               |
|               | <i>Vegetia ducalis</i> Jordan, 1922                       | OL912815  | Nethavhani et al. (2022) |
|               | <i>Vegetia grimmia</i> (Geyer, 1832)                      | OL912816  | Nethavhani et al. (2022) |
|               | <i>Ludia delegorguei</i> (Boisduval, 1847)                | OL912814  | Nethavhani et al. (2022) |
|               | <i>Holocerina smilax</i> (Westwood, 1849)                 | OL912813  | Nethavhani et al. (2022) |
|               | <i>Eochroa trimenii</i> C. & R. Felder, 1874              | OL912808  | Nethavhani et al. (2022) |
|               | <i>Nudaurelia cytherea</i> (Fabricius, 1775)              | OL912953  | Nethavhani et al. (2022) |
|               | <i>Nudaurelia wahlbergii</i> (Boisduval, 1847)            | OL912817  | Nethavhani et al. (2022) |
|               | <i>Bunaea alcinoe</i> (Stoll, 1780)                       | OL912807  | Nethavhani et al. (2022) |
|               | <i>Gonimbrasia tyrreha</i> (Cramer, 1775)                 | OL912810  | Nethavhani et al. (2022) |
|               | <i>Gonimbrasia belina</i> (Westwood, 1849)                | NC_046032 | Langley et al. (2020)    |
|               | <i>Gynanisa maja</i> (Klug, 1836)                         | NC_046033 | Langley et al. (2020)    |
|               | <i>Heniocha apollonia</i> (Cramer, 1779)                  | OL912811  | Nethavhani et al. (2022) |
|               | <i>Heniocha dyops</i> (Maassen, 1872)                     | OL912812  | Nethavhani et al. (2022) |
|               | <i>Sinobirma bouyeri</i> Naumann, Nässig & Rougerie, 2012 | OR754233  | Liu (2024)               |
|               | <i>Salassa olivacea</i> (Oberthür, 1890)                  | OR773099  | This Paper               |
| Bombycidae    | <i>Rondotia menciana</i> Moore, 1885                      | KC881286  | Kong & Yang (2015)       |
|               | <i>Bombyx mandarina</i> (Moore, 1872)                     | OK358669  | Kim et al. (2022)        |
| Lasiocampidae | <i>Dendrolimus kikuchii</i> Matsumura, 1927               | KY000412  | Qin et al. (2019)        |

- Chen DB, Zhang RS, Jin XD, Yang J, Li P, Liu YQ (2021) First complete mitochondrial genome of *Rhodinia* species (Lepidoptera: Saturniidae): genome description and phylogenetic implication. *Bulletin of Entomological Research* 112(2): 243–252.
- Chen MM, Li Y, Chen M, Wang H, Li Q, Xia RX, Zeng CY, Li YP, Liu YQ, Qin L (2014) Complete mitochondrial genome of the atlas moth, *Attacus atlas* (Lepidoptera: Saturniidae) and the phylogenetic relationship of Saturniidae species. *Gene* 545(1): 95–101.
- Cheng AP, Huang CC, Cheng YT, Tseng YW, Wang CC, Lai IL, Hunga KH (2022) Complete mitogenome of *Antheraea formosana* Sonan, 1937 (Lepidoptera: Saturniidae): an endemic silkworm in Taiwan. *Mitochondrial DNA Part B* 7(3): 446–447.
- Jiang ST, Hong GY, Yu M, Li N, Yang Y, Liu YQ, Wei ZJ (2009) Characterization of the complete mitochondrial genome of the giant silkworm moth, *Eriogyna pyretorum* (Lepidoptera: Saturniidae). *International Journal of Biological Sciences* 5(4):351–365.
- Kim JS, Park JS, Kim MJ, Kang PD, Kim SG, Jin BR, Han YS, Kim I (2012) Complete nucleotide sequence and organization of the mitochondrial genome of eri-silkworm, *Samia cynthia ricini* (Lepidoptera: Saturniidae). *Journal of Asia-Pacific Entomology* 15(1): 162–173.
- Kim JS, Kim MJ, Jeong JS, Kim I (2018) Complete mitochondrial genome of *Saturnia jonasii* (Lepidoptera: Saturniidae): genomic comparisons and phylogenetic inference among Bombycoidea. *Genomics* 110(5): 274–282.
- Kim SR, Kim MI, Hong MY, Kim KY, Kang PD, Hwang JS, Han YS, Jin BR, Kim I (2009) The complete mitogenome sequence of the Japanese oak silkworm, *Antheraea yamamai* (Lepidoptera: Saturniidae). *Molecular Biology Reports* 36(7): 1871–1880.
- Kim SR, Kim JS, Kim KY, Kim MJ, Jeong JS, Kim I (2017) Complete mitochondrial genome of the wild silkworm, *Saturnia boisduvalii* (Lepidoptera: Saturniidae). *Entomological Research* 47(6): 344–351.
- Kim MJ, Park JS, Kim H, Kim SR, Kim SW, Kim KY, Kwak W, Kim I (2022) Phylogeographic relationships among *Bombyx mandarina* (Lepidoptera: Bombycidae) populations and their relationships to *B. mori* inferred from mitochondrial genomes. *Biology (Basel)* 11(1): 68.
- Kong WQ, Yang JH (2015) The complete mitochondrial genome of *Rondotia menciaana* (Lepidoptera: Bombycidae). *Journal of Insect Science* 15(1): 48.
- Langley J, van der Westhuizen S, Morland G, van Asch B (2020) Mitochondrial genomes and polymorphic regions of *Gonimbrasia belina* and *Gynanisa maja* (Lepidoptera: Saturniidae), two important edible caterpillars of Southern Africa. *International Journal of Biological Macromolecules* 144: 632–642.
- Liu J, Dai JJ, Jia JJ, Zong YM, Sun YH, Peng Y, Wang L, Qian C, Zhu BJ, Wei GQ (2021) Characterization and phylogenetic analysis of the complete mitochondrial genome of *Saturnia japonica*. *Biochemical Genetics* 60(3): 914–936.
- Liu QN, Zhu BJ, Dai LS, Wei GQ, Liu CL (2012) The complete mitochondrial genome of the wild silkworm moth, *Actias selene*. *Gene* 505(2): 291–299.
- Liu YQ, Li YP, Pan MH, Dai FY, Zhu XW, Lu C, Xiang ZH (2008) The complete mitochondrial genome of the Chinese oak silkworm, *Antheraea pernyi* (Lepidoptera: Saturniidae). *Acta Biochimica et Biophysica Sinica* 40(8): 693–703.
- Liu YQ (unpublished) The complete mitochondrial genome of American silkworm *Antheraea polyphemus*.
- Liu ZY (2024) Preimaginal evidence further elucidates the evolutionary history of the genus *Sinobirma* Bryk, 1944 (Lepidoptera: Saturniidae). *Arthropod Systematics & Phylogeny* 82: 201–233.
- Lu DC, Huang YX, Naumann S, Kitching IJ, Xu ZB, Sun Y, Wang X (2022) Mitochondrial genomes of two wild silkworms, *Samia watsoni* and *Samia wangi* (Lepidoptera: Saturniidae), and their phylogenetic implications. *European Journal of Entomology* 119: 337–353.

Nethavhani Z, Strauli R, Hiscock K, Veldtman R, Morton A, Oberprieler RG, van Asch B (2022) Mitogenomics and phylogenetics of twelve species of African Saturniidae (Lepidoptera). *PeerJ* 10: e13275.

Park JS, Kim MJ, Kim I (2016) The complete mitochondrial genome of the moon moth, *Actias aliena* (Lepidoptera: Saturniidae). *Mitochondrial DNA Part A* 27(1): 149–150.

Qin J, Li J, Gao Q, Wilson JJ, Zhang AB (2019) Mitochondrial phylogeny and comparative mitogenomics of closely related pine moth pests (Lepidoptera: Dendrolimus). *Peer J* 7: e7317.

Shantibala T, Victor T, Luikham R, Arunkumar KP, Sharma HD, Lokeshwari RK, Kim I (2016) Complete mitochondrial genome of the wild eri silkworm, *Samia canningi* (Lepidoptera: Saturniidae). *Mitochondrial DNA Part A* 27(2): 844–845.

Shantibala T, Devi KM, Lokeshwari RK, Anju S, Luikham R (2018) Complete mitochondrial genome of a latent wild oak tasar silkworm, *Antheraea frithi* (Lepidoptera: Saturniidae). *Mitochondrial DNA Part B* 3(1): 15–16.

Sima YH, Chen M, Yao R, Li YP, Liu T, Jin X, Wang LP, Su JF, Li XS, Liu YQ (2013) The complete mitochondrial genome of the ailanthus silkworm, *Samia cynthia cynthia* (Lepidoptera: Saturniidae). *Gene* 526 (2): 309–317.

Singh D, Kabiraj D, Sharma P, Chetia H, Mosahari PV, Neog K, Bora U (2017) Complete mitochondrial genome of golden silk producer *Antheraea assamensis* and its comparative analysis with other lepidopteran insects. *PLOS ONE* 12(11): e0188077.

Zhao F, Su TJ, He B, Jiang K, Zuo CX, Lin GH, Huang ZH (2021) Complete mitochondrial genome of *Actias dubernardi* (Lepidoptera: Saturniidae). *Mitochondrial DNA Part B* 6(2): 627–628.
