# Supplementary material
Source: publisher figshare collection journal article supplement (https://brill.figshare.com/articles/dataset/_/25568169)

# PCG+Sa

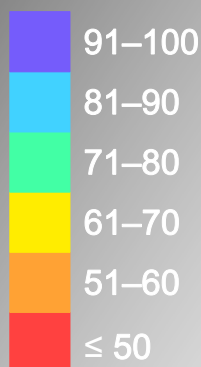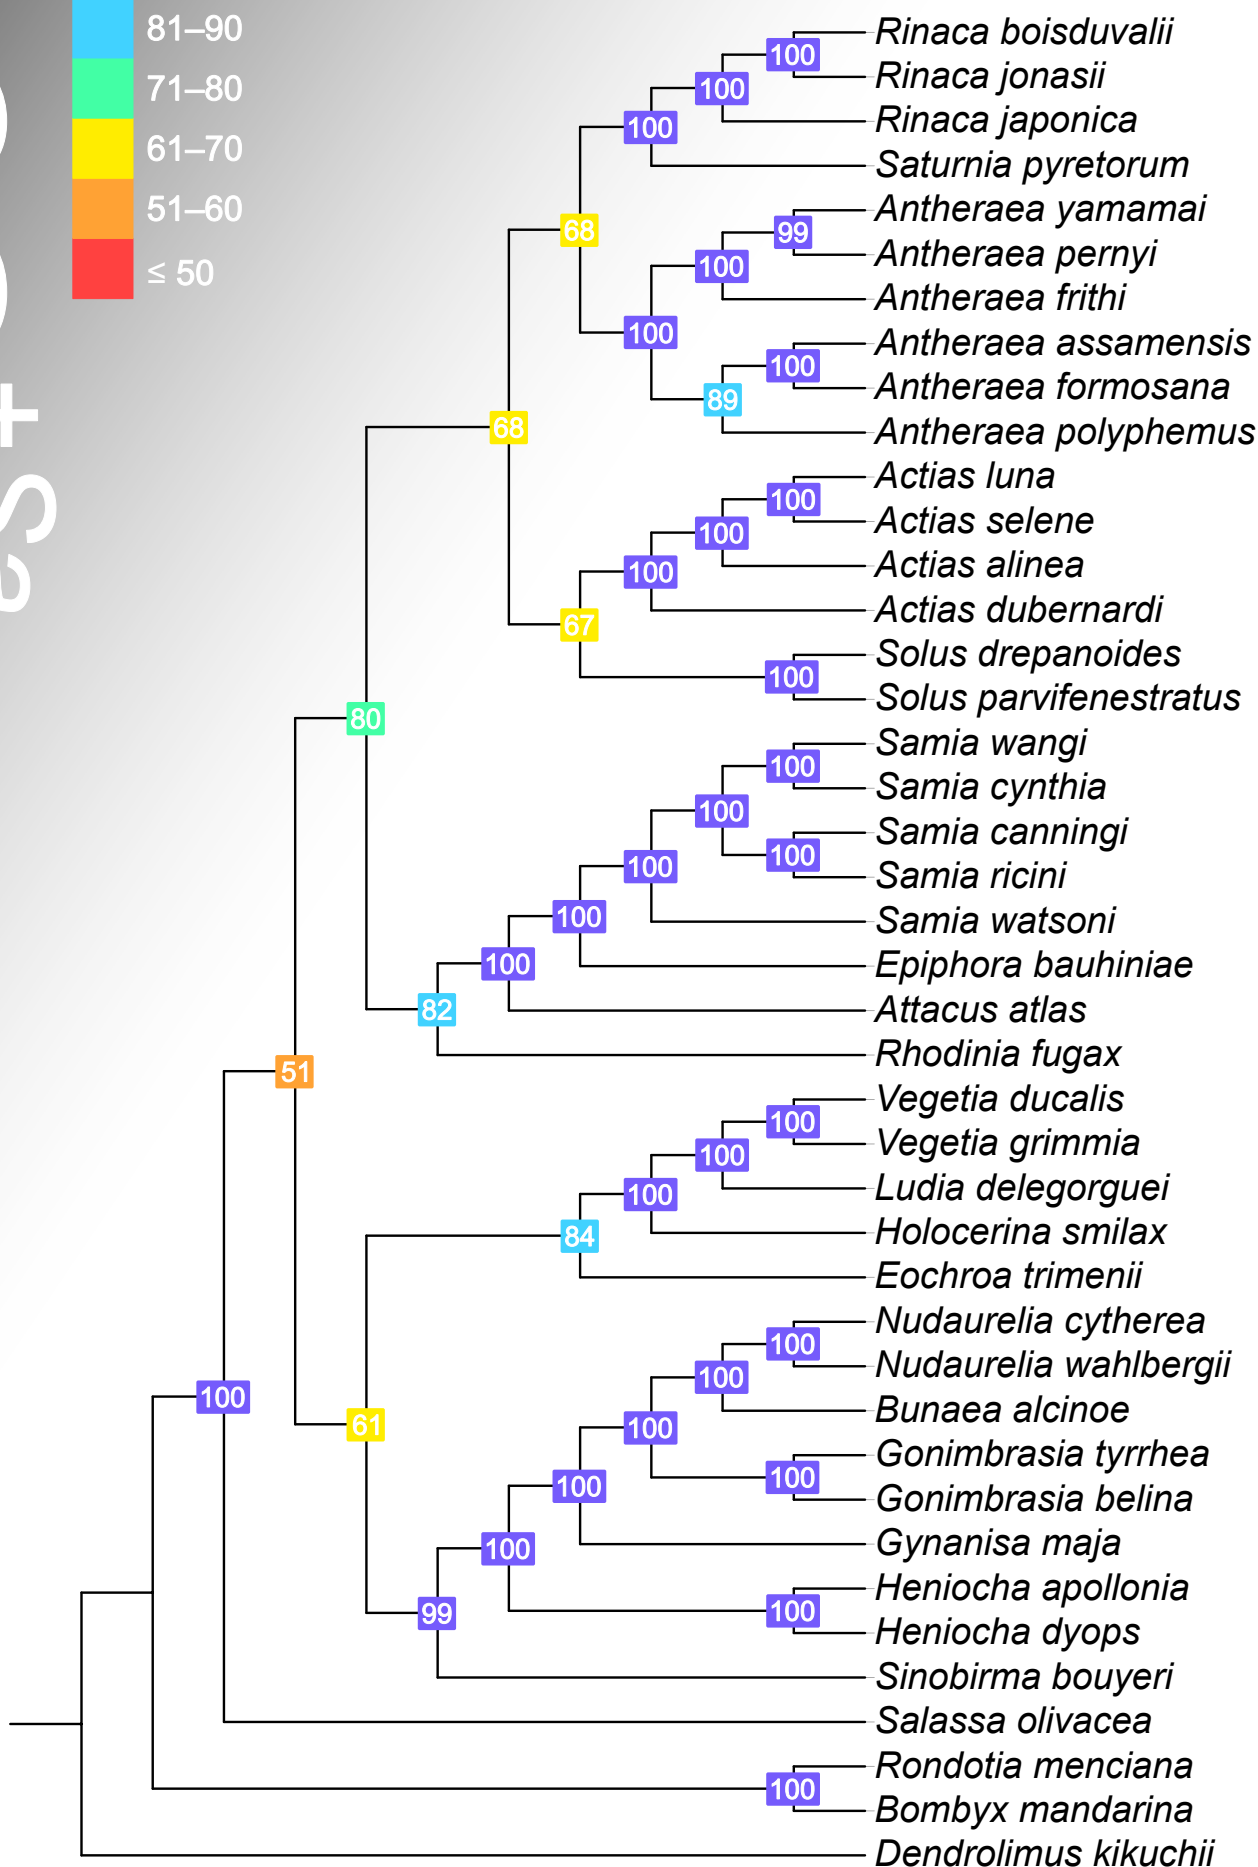

# PCG-Sa

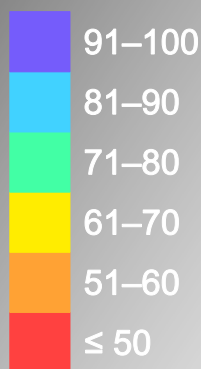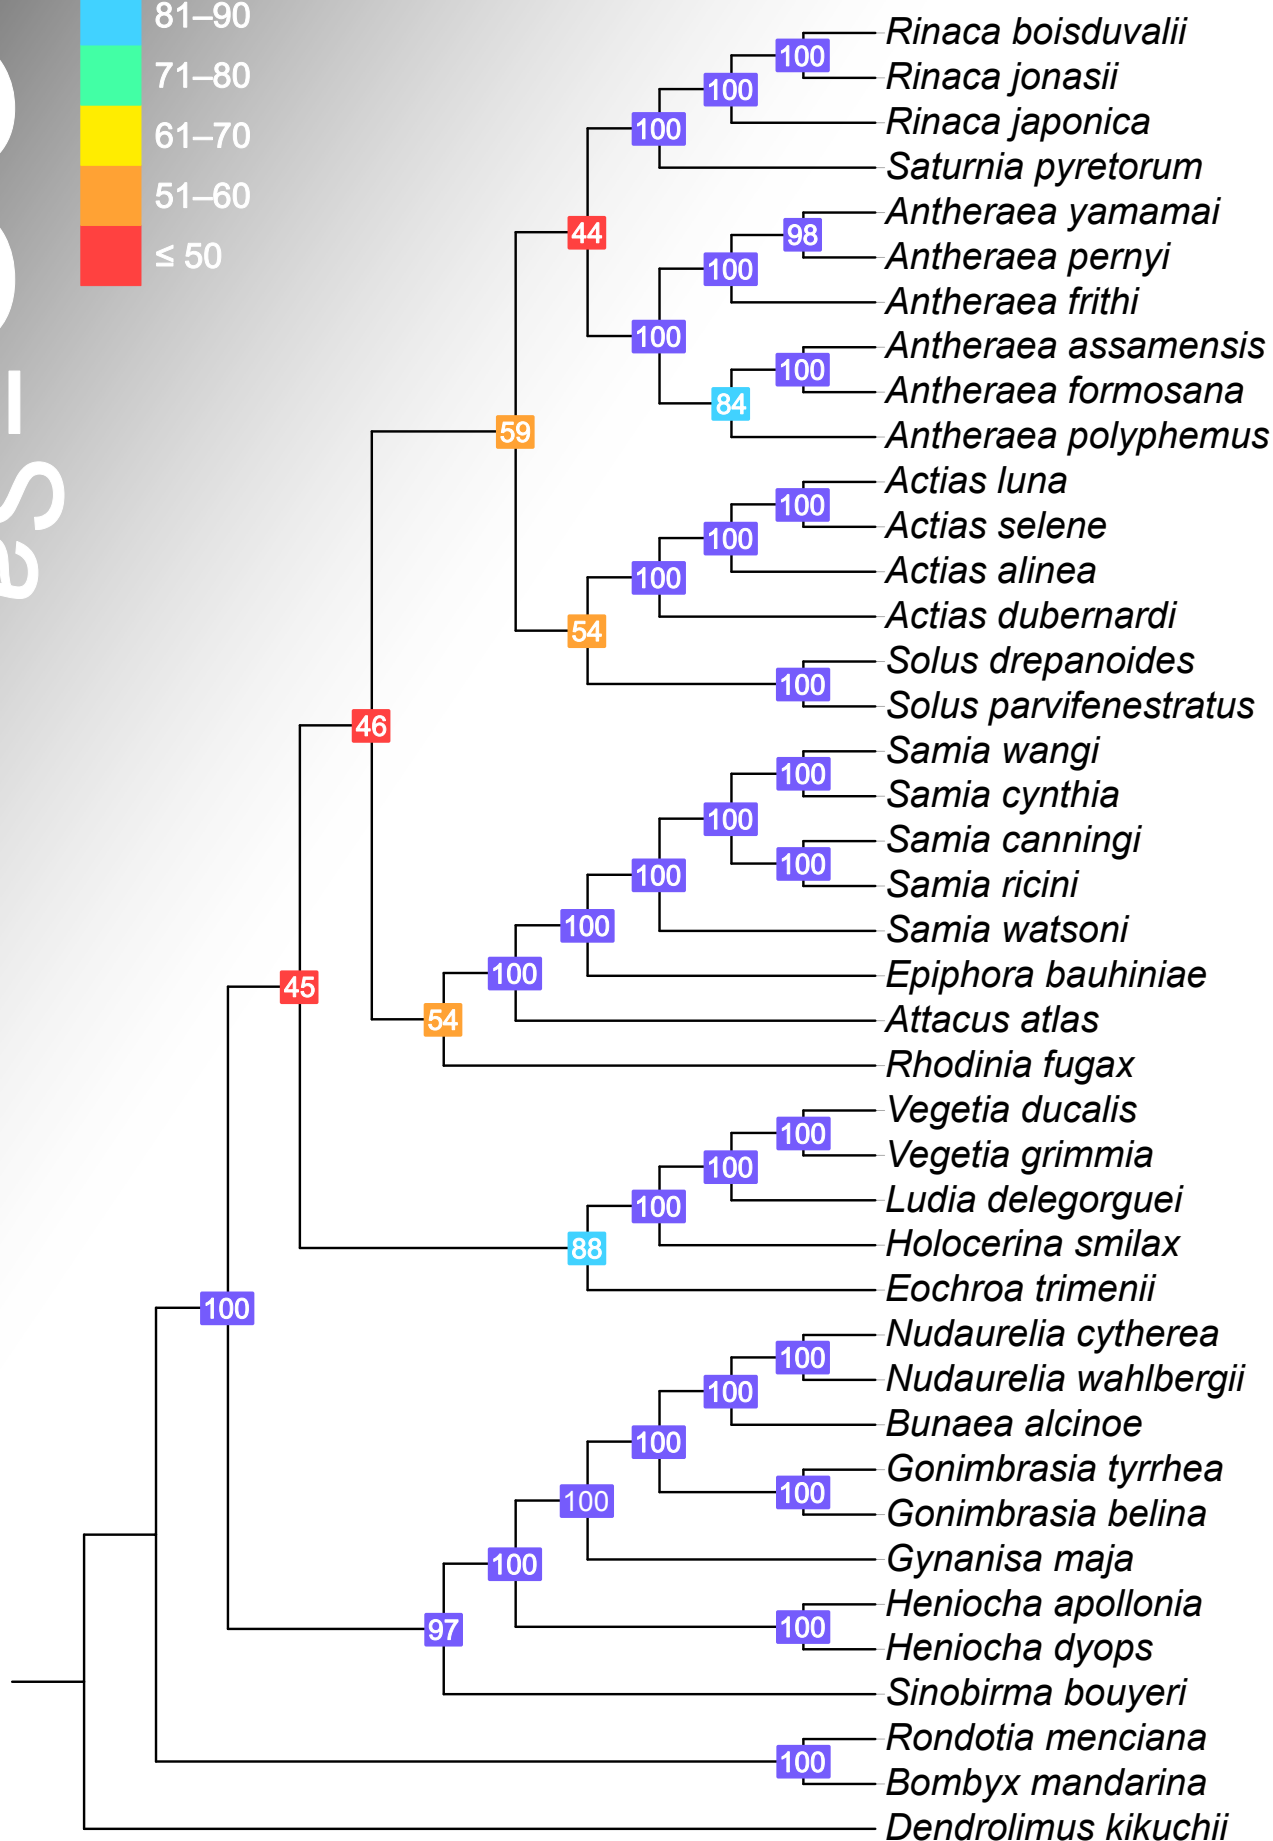

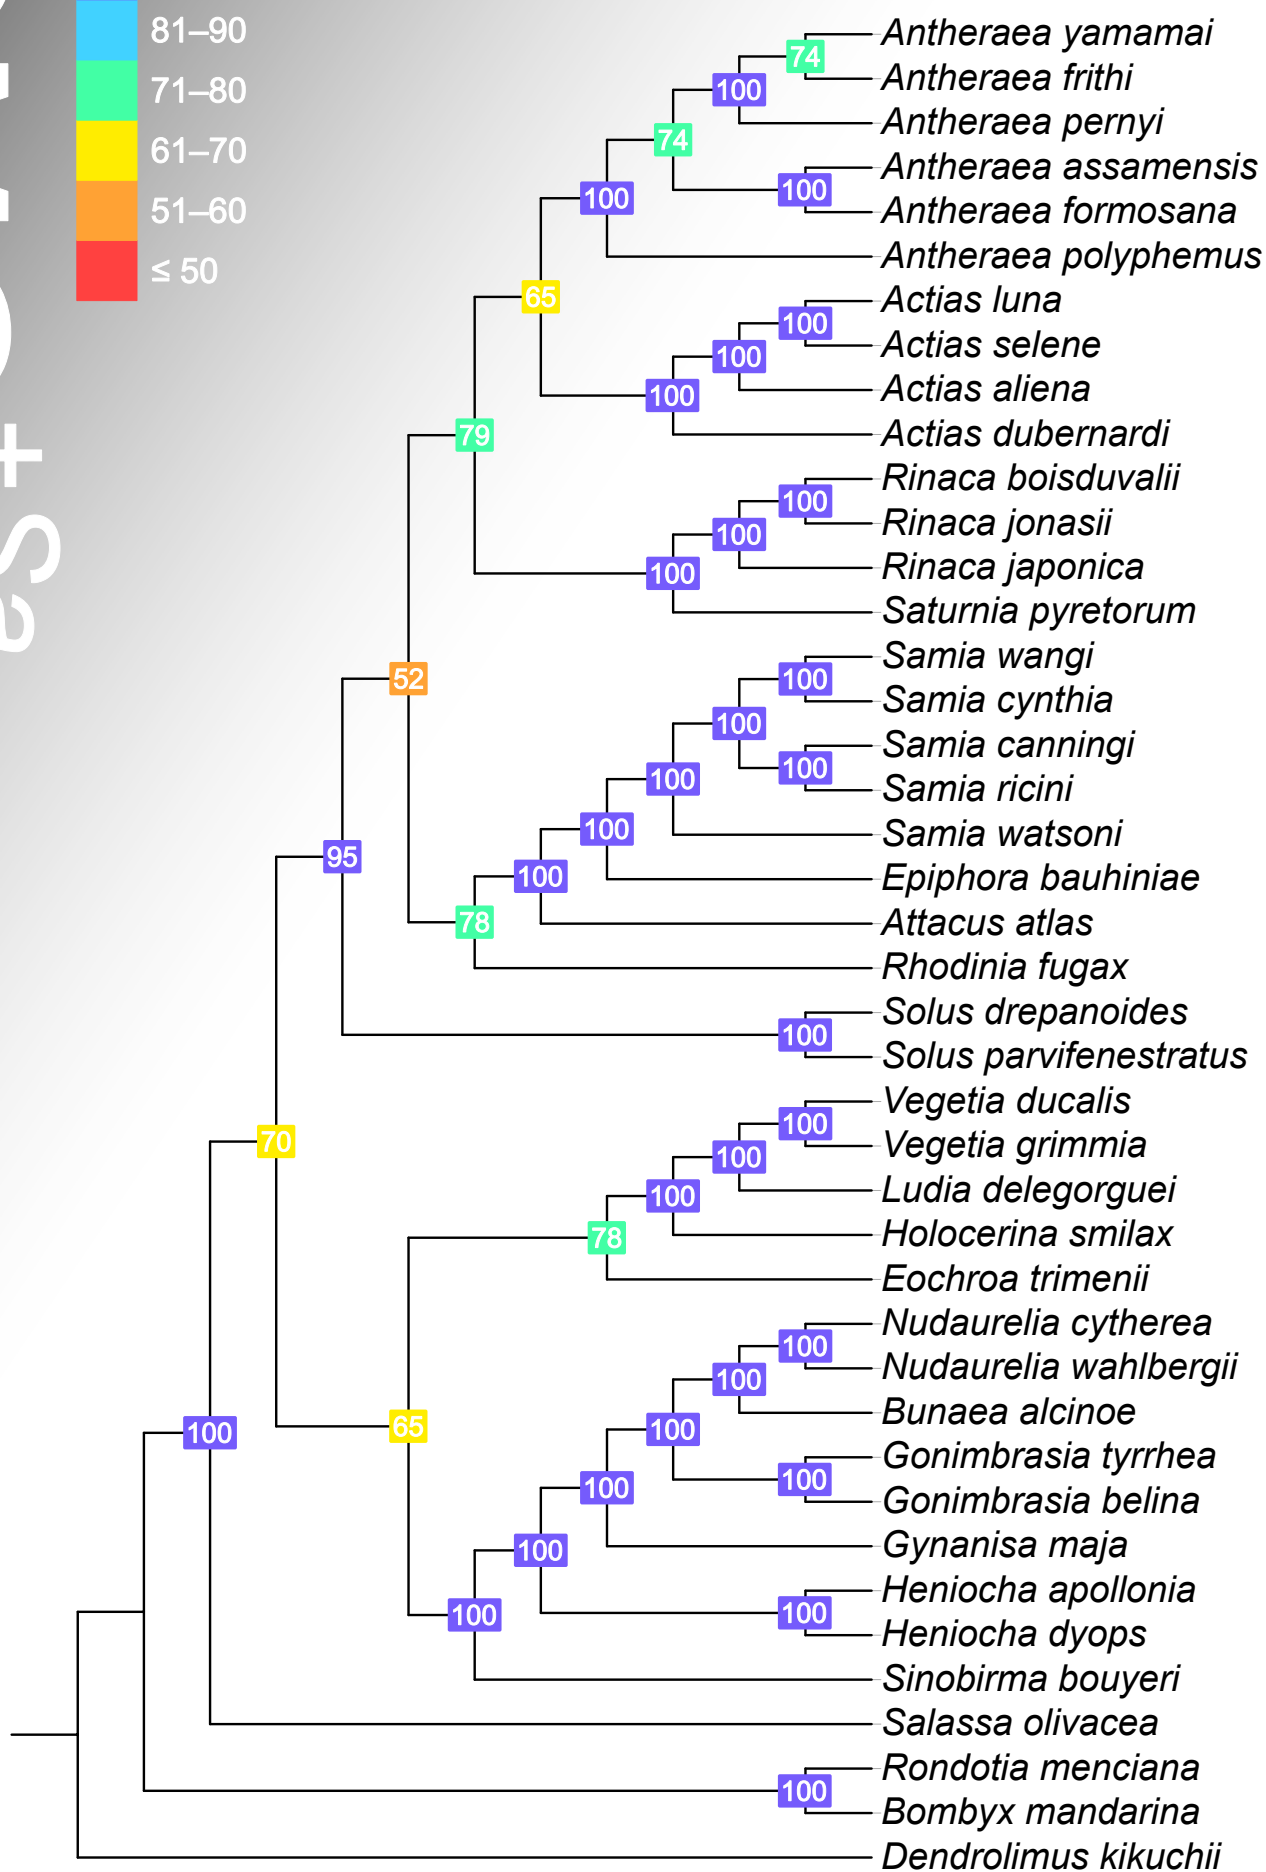

|        |
|--------|
| 91-100 |
| 81-90  |
| 71-80  |
| 61-70  |
| 51-60  |
| ≤ 50   |

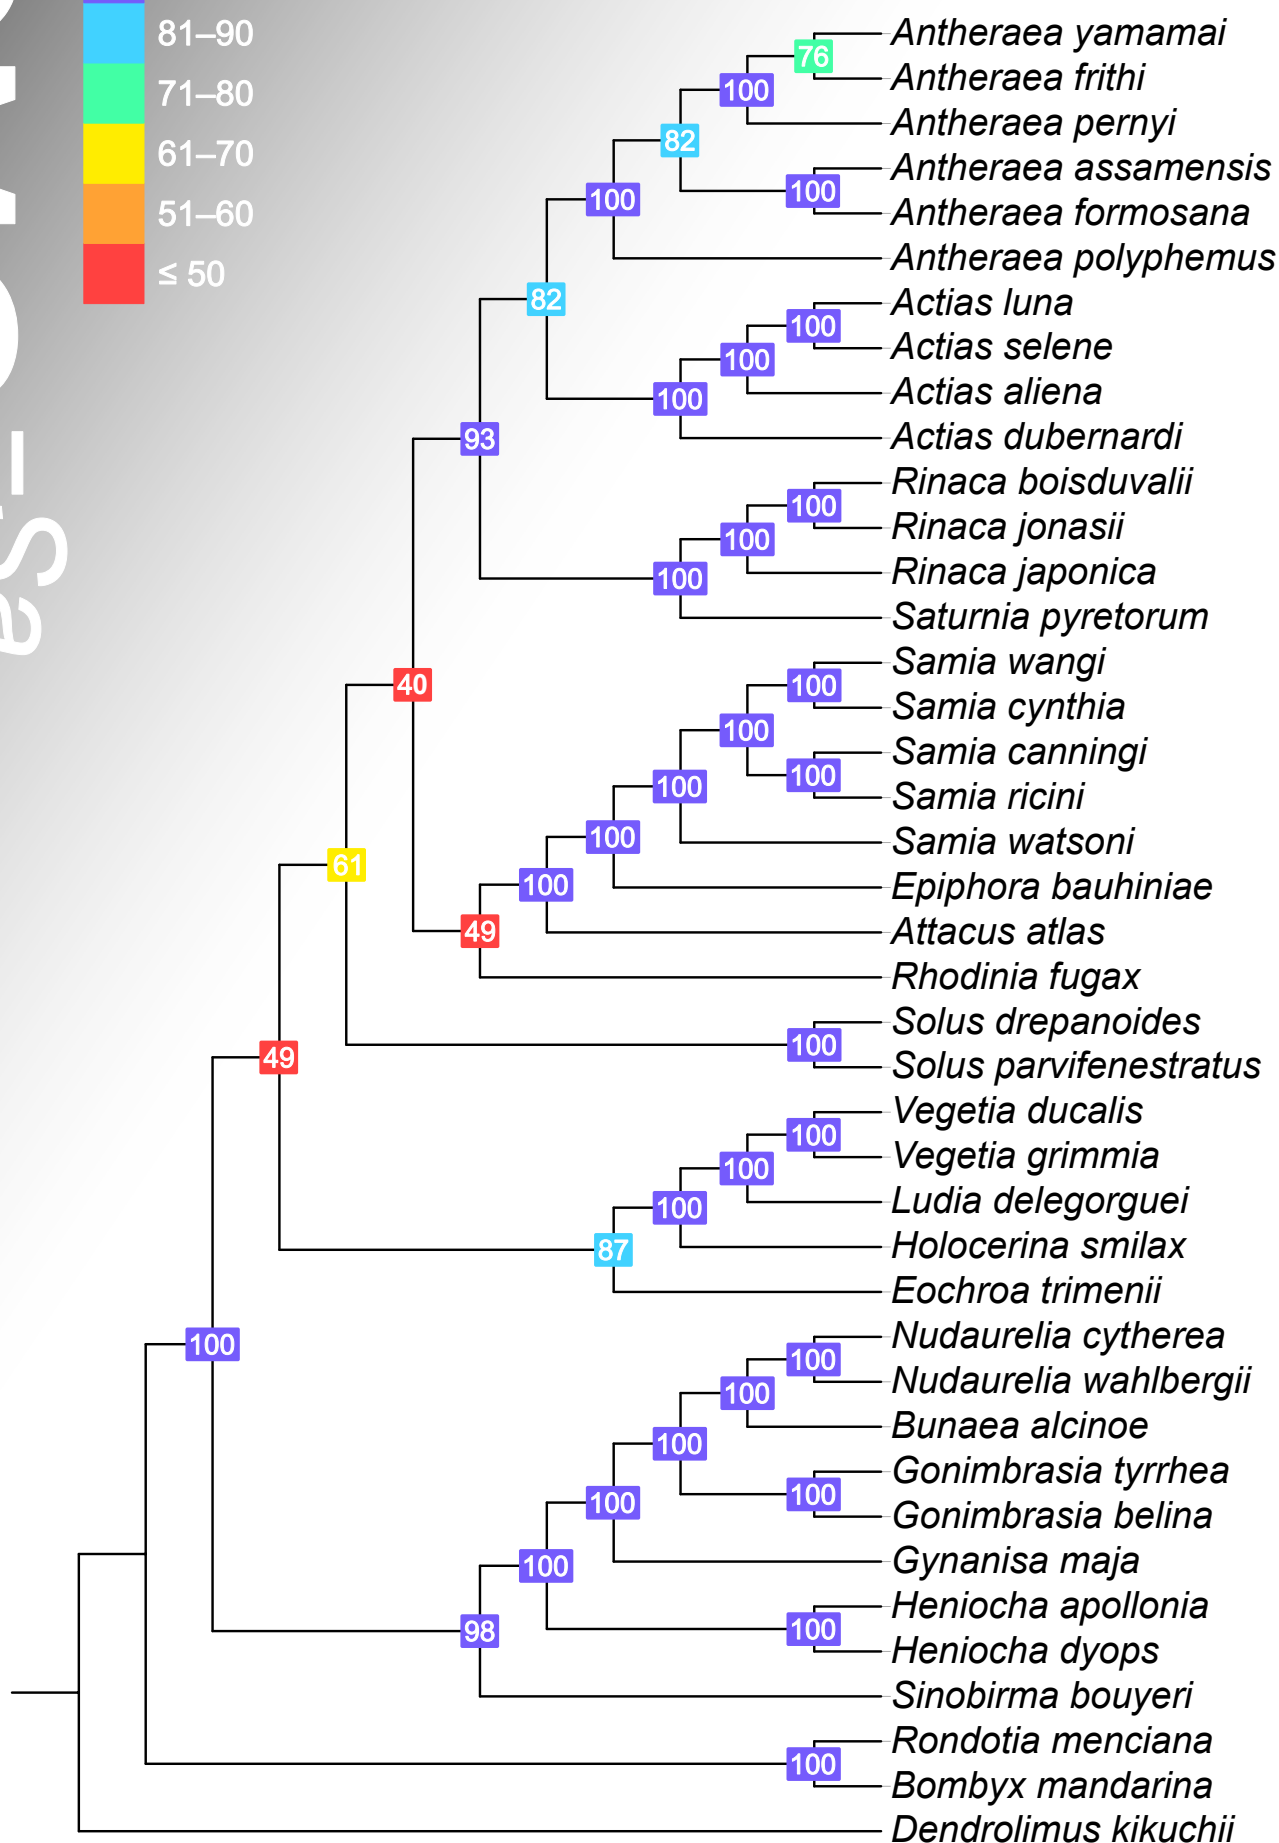

Supplement: Supplementary file 2 [file 3]
